1 **Effect of gastrointestinal alterations mimicking elderly conditions on in vitro**  
2 **digestion of meat and soy proteins**

3 Chong Wang<sup>a,b</sup>, Fan Zhao<sup>b</sup>, Yun Bai<sup>a</sup>, Chunbao Li<sup>a</sup>, Xinglian Xu<sup>a</sup>, Karsten Kristiansen<sup>b,c,\*</sup>, Guanghong  
4 Zhou<sup>a,\*</sup>

5

6 <sup>a</sup> *College of Food Science and Technology, Nanjing Agricultural University; Key Laboratory of Meat*  
7 *Products Processing, Ministry of Agriculture; Jiangsu Collaborative Innovation Center of Meat*  
8 *Production and Processing, Quality and Safety Control, Nanjing, 210095, P.R. China*

9 <sup>b</sup> *Laboratory of Genomics and Molecular Biomedicine, Department of Biology, University of*  
10 *Copenhagen, Copenhagen 2100, Denmark*

11 <sup>c</sup> *Institute of Metagenomics, BGI-Shenzhen, Shenzhen 518083, P. R. China*

12 \*Correspondence author: Guanghong Zhou (guanghong.zhou@hotmail.com);

13 Karsten Kristiansen (kk@bio.ku.dk)

14 **Abstract**

15 We evaluated the digestion of meat (chicken, beef, and pork) and soy proteins under in vitro  
16 conditions mimicking gastrointestinal (GI) conditions of adults (control, C) and elderly with  
17 achlorhydria (EA). The changes in degree of hydrolysis (DH), SDS-PAGE profiles, peptide  
18 concentration, and proteomics profiles during the digestion process were investigated. Digestion  
19 under the EA condition markedly decreased the DH of all protein sources, especially for soy  
20 protein. SDS-PAGE profiling and proteomics showed that myofibrillar/sarcoplasmic protein from  
21 meat and glycinin/beta-conglycinin from soy were the proteins most affected by the different  
22 digestive conditions. Our results indicated that the difference in the digestibility of meat protein  
23 between EA and control conditions gradually narrowed from the gastric to the intestinal phase,  
24 while a pronounced difference between control and EA conditions was maintained also in the  
25 intestinal phase. This work provides new insights of value for future dietary recommendations for  
26 elderly individuals.

27 **Keywords:** Elderly; Protein sources; In vitro digestion; Digestibility; Proteomics

## 28 **1. Introduction**

29 Life expectancy has increased worldwide and the population aged more than 60 years old will  
30 reach two billion by 2050 (Nations, 2019). According to the recent Chinese data of the seventh  
31 national population census, the number of individuals aged 60 years or beyond surpasses infants  
32 and youth (aged below 14 years of age) (Cheng & Duan, 2021). Consequently, this will be  
33 accompanied by global major challenges in relation to elderly wellness, including lifestyle and  
34 nutritional issues. The physiological functions declining with aging include gastrointestinal (GI  
35 tract) functions (Shani-Levi et al., 2017) with achlorhydria - the absence of gastric acid  
36 (hydrochloric acid) secretion in the stomach being one of the most common age-related gut  
37 disorders. The prevalence of achlorhydria increases from 2.5% in persons in the 30s to 12% in  
38 persons in the 80s (Villanacci et al., 2017). A study involving 3484 subjects revealed that 27%  
39 suffered from a varying degree of achlorhydria, and the greatest incidence (39.8%) occurred in  
40 females 80 to 89 years of age (Sharp & Fister, 1967). Gastric acid plays a pivotal role in food  
41 digestion by activating pepsin. Simultaneously, the acidic environment also inhibits or eliminates  
42 many microorganisms. Accordingly, achlorhydria is likely to influence digestion and absorption  
43 of food constituents in a number of elderly individuals. An in vitro study on gastric digestion of  
44 major milk proteins indeed revealed that hydrolysis of caseins proceeded slower in conditions  
45 mimicking digestion in elderly compared to those of younger individuals (Aalaei, Khakimov, De  
46 Gobba, & Ahrné, 2021).

47 Food composition, protein sources and amino acid composition, physicochemical characteristics  
48 including texture, structure and solubility affect the bioavailability of proteins. Wen et al. (2015)  
49 reported that pepsin-mediated in vitro digestion of pork and beef produced similar patterns of  
50 peptides that differed from peptides produced by digestion of chicken and fish meat, and clear

51 differences in the rate of digestion of casein and whey have been well documented (Dangin et al.,  
52 2001). However, these digestion studies were not performed using conditions mimicking the  
53 conditions in the stomach of elderly, and thus, studies exploiting stomach conditions resembling  
54 the conditions in elderly are warranted, also in order to provide dietary recommendations for  
55 elderly individuals.

56 Due to high cost and technical and ethical restrictions of animal studies, in vitro digestion has  
57 become an alternative method to evaluate digestibility of proteins enabling easy reproducible  
58 sampling (Hur, Lim, Decker, & McClements, 2011). Thus, an international consensus for a static  
59 protocol, INFOGEST, reflecting the physiological conditions in humans was adopted in 2014  
60 (Minekus et al., 2014). Recently, in vitro digestion studies using conditions resembling those of  
61 the GI tract in elderly have been reported. Hernández-Olivas, Muñoz-Pina, Andrés, & Heredia  
62 (2020) investigated the effect of altered GI conditions on the proteolysis of different kinds of fish  
63 (salmon, sardine, sea bass and hake). They found that proteolysis was significantly affected using  
64 conditions mimicking the alterations observed in the elderly GI (33-42% reduction). Subsequently,  
65 this research group also assessed the impact of cooking of eggs (hard-boiled, poached, and omelet)  
66 on protein digestion, and based on the results they recommended intake of hard-boiled and poached  
67 eggs to elderly individuals (Hernández-Olivas, Muñoz-Pina, Andrés, & Heredia, 2021). Even  
68 though these studies have indicated impaired digestion in elderly, details on how different protein  
69 sources are digested in elderly versus young individuals are still scarce, and more detailed studies  
70 are clearly warranted.

71 The present study applied in vitro digestion models mimicking young adult and elderly conditions  
72 to investigate the digestion profiles of meat (chicken, beef and pork) protein and soy protein,  
73 focusing on elucidating protein digestion changes under altered digestion conditions.

## 74 **2. Materials and methods**

### 75 2.1 Materials

76 Pepsin from porcine gastric mucosa ( $\geq 2500$  U/mg), pancreatin from porcine pancreas ( $8 \times$  USP),  
77 bovine bile powder, analytical grade salts (CaCl<sub>2</sub>, KCl, KH<sub>2</sub>PO<sub>4</sub>, NaHCO<sub>3</sub>, NaCl, MgCl<sub>2</sub>(H<sub>2</sub>O)<sub>6</sub>,  
78 (NH<sub>4</sub>)<sub>2</sub>CO<sub>3</sub>, CaCl<sub>2</sub>(H<sub>2</sub>O)<sub>2</sub>), NaOH, HCl, methanol (HPLC grade,  $\geq 99.9\%$ ), dichloromethane  
79 (HPLC grade,  $\geq 99.9\%$ ), acetone (HPLC grade), trifluoroacetic acid, L-leucine and fluorescamine  
80 were purchased from Sigma-Aldrich (Deisenhofen, Germany). Chicken pectoralis major muscle,  
81 beef longissimus dorsi muscle, pork longissimus dorsi muscle, and soy protein (isoflavones were  
82 removed by extraction with 80% methanol) were purchased from Linyi Shansong Biological  
83 Products Co., Ltd. (Linyi, China).

### 84 2.2 Sample preparation

85 After removal of the visible fat and connective tissues, the muscles were cut into pieces, placed in  
86 plastic bag and cooked in a 90 °C water bath until the internal temperature reached 70 °C. After  
87 cooking, meat samples were cooled at room temperature and ground into powder. The  
88 intramuscular fat was extracted and removed by using a mixture of methylene chloride/methanol  
89 (2:1, v/v), the extraction process was repeated once. After fat extraction, the residual solvent was  
90 removed by evaporation and the resulting protein powder was passed through a 100 Mesh sieve.  
91 The final protein powders were stored at -20 °C.

### 92 2.3 In vitro digestion

93 A static in vitro digestion system was applied. The control model corresponding to standard GI  
94 conditions of healthy young adults was established according to the standardized INFOGEST

95 protocol (Minekus et al., 2014). The elderly model corresponding to conditions of the elderly  
96 population with achlorhydria was established according to Shani-Levi et al. (2017) and Russell et  
97 al. (1993). The specific conditions of each model are shown in Suppl. Table 1. Briefly, protein  
98 powder (1.0 g) was mixed with 14.4 mL simulated gastric fluid (SGF), and then this mixture was  
99 homogenized. After that, 6 mol/L HCl were added to adjust the pH to the predetermined values,  
100 3.0 for control and 6.0 for elderly conditions, respectively, and 1.6 mL pepsin solution were added  
101 to start the gastric digestion. The mixture was incubated at 37 °C for 2 h. After 1, 10, 20, 30, 60  
102 and 120 min, 0.5 mL of digest was collected and mixed with 0.5 mL of simulated intestinal fluid  
103 (SIF) to inactivate pepsin. For intestinal digestion, 10 mL of gastric digest were withdrawn and  
104 mixed with 6 mL SIF. After pH adjustment to 7.0, 1.25 mL bile and 2 mL pancreatin solution were  
105 added to start the intestinal digestion. The mixture was incubated at 37 °C for 2 h or 4 h depending  
106 on the digestive model. After 1, 10, 20, 30, 60, 120 and 240 min, 0.5 mL of digestive solution was  
107 withdrawn and pefabloc was added to a final concentration of 4 mM to stop intestinal digestion.  
108 All aliquots were stored at -80 °C prior to further analysis.

#### 109 2.4 Degree of Hydrolysis

110 A fluorecamine assay was carried out to evaluate the degree of hydrolysis (DH) of digested protein  
111 as described by (Larsen, Rasmussen, Bjerring, & Nielsen, 2004). Briefly, 75 µL of each digesta  
112 were mixed with 24% trichloroacetic acid (v/v=1:1) and precipitated on ice for 30 min. The  
113 solution was centrifuged at 4 °C for 30 min at 13000 rpm. Afterward, 30 µL of standard (L-leucine)  
114 or digesta were mixed with 900 µL sodium tetraborate (0.1 M, pH 8.0) and 300 µL fluorescamine  
115 acetone solution (0.2 mg/mL). Fluorescence was determined at excitation and emission  
116 wavelengths of 390 and 480 nm, respectively. The DH was calculated as followed:

117 
$$DH = \frac{[-NH_2(h)] - [-NH_2(0)]}{[-NH_2(\infty)] - [-NH_2(0)]}$$

118 [-NH<sub>2</sub> (h)] and [-NH<sub>2</sub> (0)] denotes the concentration of primary amines in the hydrolyzed (h) and  
119 unhydrolyzed (0) samples, respectively. [-NH<sub>2</sub> (∞)], indicating the theoretical maximal primary  
120 amine concentration measured by fluorescence of a raw sample which was completely hydrolyzed  
121 by HCl at 100 °C for 48 h.

## 122 2.5 SDS-PAGEs

123 Proteins in the digesta were separated and quantified by SDS-PAGE with 4-20% precast gel  
124 (Genscript, USA). Each sample was diluted and mixed with 5× loading buffer to reach the  
125 concentration of 4 mg/mL. All samples were heated at 95 °C for 5 min and then loaded onto the  
126 gel. The gels were run at 180 V for approximately 40 min until the band of bromophenol blue dye  
127 just disappeared. After electrophoresis, the gels were stained by Coomassie Brilliant Blue R250  
128 for 0.5 h and destained until the bands were clear. Gel images were obtained by using an image  
129 scanner (GE Healthcare, U.K.)

## 130 2.6 LC-MS/MS analysis of digested proteins

131 A label-free proteomics protocol was applied to determine protein profiles. All samples were  
132 centrifuged at 12000 rpm for 20 min at 4 °C, and the supernatant was filtered using a 10 kDa  
133 molecular weight cut-off ultrafiltration tube (Millipore, USA). After that, the peptide mixtures  
134 were desalted using C18 cartridges (Waters, USA), concentrated by vacuum centrifugation and  
135 reconstituted with 0.1% TFA. The peptide concentration was assessed using Nanodrop at 280 nm.  
136 A Nano-LC 1000 tandem with Q Exactive mass spectrometer (Thermo Fisher Scientific, USA)  
137 was used to separate and analyze the peptide profiles. 2 μL of each sample were loaded onto a RP-

138 C18 column (15 mm × 75 μm × 3 μm, Thermo Fisher Scientific). 2% acetonitrile with 0.1 %  
139 formic acid (A) and 80% acetonitrile with 0.1 % formic acid (B) were used for mobile phases, and  
140 the flow rate was 250 nL/min. The gradient program was as follows: 0-50 min, linear gradient  
141 from 4 to 50% eluent B; 50-54 min, linear gradient from 50-100% eluent B; 54-60 min, 100%  
142 eluent B. Electrospray ionization (ESI) was applied in the positive mode with the following  
143 parameters: MS data was acquired using a data-dependent top 10 method dynamically exclusion  
144 to screen the most abundant precursor ions from survey scan (300-1800 m/z) for HCD  
145 fragmentation. Dynamic exclusion duration was 25 s. Survey scans were acquired at a resolution  
146 of 70,000 at m/z 200 and resolution for HCD spectra was set to 17,500 at m/z 200. Normalized  
147 collision energy was 30 eV.

148 The MS data were analyzed using the MaxQuant software (version 1.3.0.5) and searched against  
149 the corresponding UniProt *Gallus gallus*, *Bos Taurus*, *Sus scrofa*, *Glycine max* database. The  
150 precursor mass and MS/MS tolerance of peptide were set to 6 and 20 ppm, respectively. No  
151 enzyme was selected to conduct enzymatic cleavage. The cut-off global false discovery rate (FDR)  
152 for peptide and protein identification was set to 1%. Protein abundance was calculated on the basis  
153 of the normalized spectral protein intensity (LFQ intensity). The protein intensity was quantified  
154 based on the razor and unique peptides intensity.

## 155 2.7 Statistics analysis

156 All results were calculated as the means and standard deviations. The results were analyzed by  
157 ANOVA ( $p < 0.05$ ). Comparison of the mean values was performed using Duncan's test. Statistical  
158 analyses were performed with SPSS for Windows version 20 (SPSS Inc., Chicago, IL).

## 159 3. Results and discussion



### 160 3.1 In vitro digestibility

161 The digestibility of different proteins under control and EA conditions was compared by measuring  
162 the liberation of free amino acid using the fluorescamine method. The effect of alternative digestive  
163 conditions on DH is shown in Figure 1. The DH of all protein groups increased with digestion  
164 time, but exhibited differences in relation to both digestive phases and protein sources. In the  
165 gastric phase, compared with the control condition, the elderly achlorhydria (EA) digestion  
166 condition overall led to a significant decrease in DH values regardless of protein sources. This  
167 result is consistent with Hernández-Olivas et al. (2020), who found that the proteolysis of fish in  
168 condition mimicking elderly GI conditions was lower (33-50% reduction) than using condition  
169 mimicking young adults. Of note, the digestibility of soy protein in the control condition was  
170 significantly higher than that of meat proteins, while digestibility of soy protein was the lowest  
171 when digested using the EA condition.

172 According to Shani-Levi et al. (2017), the pepsin level in the stomach of the elderly is reduced by  
173 25% compared to that of young adults. Hence, we reduced the pepsin concentration for the EA  
174 condition from 2000 to 1500 U/mL, which resulted in a notably lower digestibility of all proteins  
175 under the EA condition compared to the control condition. The activity of pepsin, the major  
176 protease in the stomach, is highly affected by the pH of the gastric juice (Roberts, 2006), and few  
177 studies have reported on the increased pH in the stomach of elderly with achlorhydria, and a slower  
178 return to the low gastric pH characterizing the fasting state after intake of a meal (Husebye, Skar,  
179 Høverstad, & Melby, 1992; Russell et al., 1993). In addition, low pH tends to result in a change in  
180 secondary or tertiary structure, resulting in the exposure of enzyme cleavage sites (Xiao et al.,  
181 2016). Carbonaro, Maselli, & Nucara (2012) found a strong negative correlation between the  $\beta$ -  
182 sheet structure and food digestibility, and an inverse linear correlation was observed between

183 antiparallel  $\beta$ -sheet structures and protein digestibility. Wan & Guo (2019) demonstrated that soy  
184 protein adopts different conformation in relation to pH, including  $\beta$ -sheet aggregation and fibril  
185 formation. Thus, our results indicate that the digestive properties of soy protein compared to meat  
186 proteins are greatly affected by pH, implying an impaired ability to digest soy protein in elderly  
187 individuals.

188 As chyme gradually empties into the small intestine, pancreatic proteases are secreted with  
189 pancreatic bicarbonate. The optimum pH for key proteases of the small intestine is known to be  
190 7.0-9.0 (Rick, 1974). Shani-Levi et al. (2017) reported that the intestinal pH of the elderly is similar  
191 to young adults. However, low levels of proteolytic enzymes (reduced to 50%) and bile are present  
192 in the small intestine of elderly compared to young adults. Accordingly, the digestibility of all  
193 proteins under the EA condition was remarkably lower than under the control condition. Using the  
194 control condition, even though digestion of soy protein in the gastric phase was faster than that of  
195 meat proteins, it was not significant different from that of meat proteins in intestinal phase.  
196 Interestingly, the digestibility of meat proteins under the EA condition, except for the soy protein,  
197 was slowly approaching the level observed for the control condition (Figure 1B). The digestibility  
198 of soy protein under the EA condition at 240 minutes (9.40%) was still far lower than that under  
199 the control condition at 120 min (35.1%). These results indicate that also in the intestinal phase  
200 digestion of soy protein was severely reduced following the gastric EA condition.

### 201 3.2 Dynamic digestive profiles evaluated by SDS-PAGE

202 The profiles of digesta during the gastrointestinal digestion process are illustrated in Figure 2. For  
203 the gastric phase, the band distribution and changes in intensity along digestion time of each meat  
204 protein group were extremely similar under both control and EA conditions. As the digestion time  
205 increased, the intensity of high molecular weight proteins diminished slightly. For example, the

206 intensity of bands around 270 kDa and 110 kDa decreased, and that of 5 kDa increased along with  
207 time reached the maximum at 120 min. This result is consistent with Zhao et al. (2019), who  
208 investigated the digestion of beef semimembranosus proteins and found that myosin heavy chain  
209 (around 270 kDa) and  $\alpha$ -actinin (around 110 kDa) were gradually hydrolyzed over time. It is worth  
210 mentioning that even though there were similar changes of the intensity of the protein bands under  
211 the EA condition over time, these changes appeared less pronounced as compared to digestion  
212 under the control condition (Figure 2A). For instance, the intensity of the bands around 5 kDa was  
213 reduced under the EA condition compared to the control condition (Figure 2A).

214 Examining the SDS gel pattern of soy protein digests, we found that the difference in digestion  
215 progression between control and EA conditions was much more pronounced than observed for  
216 meat proteins. For example, the intensity of bands around 80, 50, 40, and 20 kDa decreased quickly  
217 with digestion time for soy protein under the control condition, especially for the 80 and 50 kDa  
218 bands, which almost disappeared at 120 min. By contrast, the intensities of these bands decreased  
219 very little under the EA condition. Based on previous studies, we found that these proteins  
220 comprise  $\beta$ -conglycinin with three subunits ( $\alpha$ : 76 kDa,  $\alpha'$ : 72 kDa and  $\beta$ : 53 kDa), glycinin with  
221 acidic polypeptide (31-45 kDa) and basic polypeptide (18-20 kDa) (Tian et al., 2019). A similar  
222 phenomenon was reported by Nguyen, Bhandari, Cichero, & Prakash (2015), showing that the  
223 intensity of the bands for  $\beta$ -conglycinin, acidic polypeptide and basic polypeptide decreased with  
224 increasing digestion time. In addition, in line with the studies by Yang et al. (2016), basic  
225 polypeptides of glycinin are degraded slower than acidic polypeptides which may reflect that the  
226 basic polypeptides are more hydrophobic, and thus, more compact and less accessible to pepsin.  
227 In the intestinal phase, all proteins were further degraded both under control and EA conditions.  
228 For the meat proteins, although the digestion profiles under the EA condition was quite closed to

229 those of the control condition, digestion still proceeded slightly slower compared to the control  
230 condition. For instance, the band around 110 kDa almost disappeared for chicken and pork under  
231 the control condition and disappeared completely for beef under the control condition at 30 or 60  
232 min, but was clearly visible under the EA condition. Interestingly, the intensity of bands (5-15 kDa)  
233 at 120 and 240 min under the EA condition was higher than under the control condition, possibly  
234 due to continued proteolysis under the control condition yielding peptides <5 kDa migrating out  
235 of the gel. For soy protein, pronounced differences were observed between control and EA  
236 conditions in accordance with the result of DH. For soy, all high molecular weight proteins were  
237 digested into fragments with a molecular mass less than 35 kDa under the control condition at all  
238 digestion times, while they were barely digested under the EA condition. The results of digestion  
239 using the control condition were consistent with Nguyen et al. (2015), who concluded that the  
240 hydrolysis of  $\beta$ -conglycinin, glycinin with acidic and basic polypeptide progressed rapidly in the  
241 simulated duodenal phase and exhibited reduced intensity of the cognate bands already after 30  
242 min of digestion. As digestion proceeded, a relatively large number of small peptides were  
243 generated with molecular masses around 20 kDa. However, of note, we observed that digestion of  
244 soy protein under the EA condition remained at a low level. Moreover, the degree of digestion in  
245 the intestinal phase of soy protein under the EA condition seemed to be even more impaired than  
246 that observed under the control condition in the gastric phase.

### 247 3.3 Peptide concentrations measured by Nanodrop

248 Due to the limitation of SDS-PAGE, peptides with a molecular mass less than 5 kDa could not be  
249 reproducibly detected on the gel. Therefore, to assess the characteristics of the digesta using  
250 different digestion conditions at the level of low molecular weight peptides, peptide concentrations  
251 were determined using Nanodrop measurements (Figure 3). Under the control condition, the

252 peptide concentrations of all proteins increased steadily with digestion time both in the gastric and  
253 the intestinal phases. The highest peptide concentrations were observed at the final time point,  
254 corresponding to 2.87 and 3.04 mg/mL for chicken, 2.94 and 3.05 mg/mL for beef, 2.78 and 2.89  
255 mg/mL for pork, 2.22 and 2.15 mg/mL for soy in the gastric and the intestinal phase, respectively.  
256 There was no significant difference in the peptide concentration among the three meat proteins.  
257 This was consistent with the study by Martini, Conte, & Tagliazucchi (2019), which also reported  
258 no significant differences in peptide contents obtained from beef, chicken and pork after in vitro  
259 gastro-intestinal digestion. However, the peptide concentration of soy protein was significantly  
260 lower when compared to meat proteins, which was inconsistent with the result of the DH and SDS-  
261 PAGE analyses. It has been reported that pepsin and pancreatic peptidases involved in protein  
262 digestion may catalyze the formation of short peptides and free amino acids, respectively (Heda,  
263 Toro, & Tombazzi, 2019; Wardlaw & Insel, 1996). We speculate that the lower concentration of  
264 low molecular weight peptides from digestion of soy protein could be due to the further  
265 degradation of peptides into amino acids which could not be detected by Nanodrop at 280 nm.

266 For the EA condition, we found that although the peptide concentration increased over time in the  
267 gastric phase, there were no significant changes. At 120 min, the peptide concentration in the  
268 chicken protein group was the highest (0.61 mg/mL), followed by beef (0.39 mg/mL), pork (0.38  
269 mg/mL) and soy (0.32 mg/mL). This result agreed with the results of DH and SDS-PAGE.  
270 Although the DH of all proteins under the EA condition also increased over time, the overall DH  
271 was still at an extremely low level. For instance, the DH of chicken protein only increased from  
272 0.30% at 10 min to 1.05% at 120 min. Likewise, the SDS-PAGE patterns also showed that there  
273 were almost no visible changes in the protein bands. For the intestinal phase, we found that the  
274 peptide concentration of the meat protein groups continued to increase significantly with time,

275 with the chicken group showing the highest concentration (2.52 mg/mL), followed by beef (2.26  
276 mg/mL) and pork (2.07 mg/mL). The peptide concentration of the meat proteins under the EA  
277 condition at 240 min was very close to that observed for control condition at 30 min. The DH  
278 results showed a similar tendency. A most noteworthy observation was that the peptide  
279 concentration of soy protein in the intestinal phase following the EA condition in the gastric phase  
280 did not show a significant difference until 240 min, which was directly related to the low degree  
281 of digestion. In addition, when we compared the overall trends of peptide concentration and DH  
282 in the meat protein groups, we observed that they were very similar. However, we observed a slight  
283 difference for the individual meat proteins. For instance, the DH of the intestinal phase of pork  
284 under the EA condition was higher than chicken and beef, but the peptide concentration of pork  
285 was lower than chicken and beef. We speculate that this may reflect the principle of the method  
286 for measuring these two indicators and the different composition among chicken, beef and pork.  
287 Overall, the digestibility of all proteins under the EA condition was lower than that under the  
288 control condition, and soy protein showed the strongest pH and enzyme concentration dependency  
289 compared to the other three meat proteins.

### 290 3.4 Proteomics profile during digestion

291 Considering the limited analytical resolution of SDS-PAGE, LC-MS/MS was applied to  
292 investigate the profiles of protein digestion products at 1, 30, 120 and 240 min. The statistics and  
293 Venn diagrams of the identified proteins are presented in Figure 4 and Suppl. Table 2, respectively.  
294 As can be seen from the table, the number of identified proteins in the chicken group was the  
295 highest (269), followed by soy (225), beef (148) and pork (80). The proteomics results of the meat  
296 protein groups were similar to the previously published study by Wen et al. (2015), who also  
297 reported that the highest number of peptides were identified in the chicken group after in vitro

298 digestion, followed by beef and pork. Therefore, we conclude that there was a higher diversity of  
299 chicken digestion products than of beef and pork. In addition, highly abundant proteins were  
300 identified as myofibrillar proteins and sarcoplasmic proteins in the meat protein groups, including  
301 myosin, troponin C, actin and phosphorylase. These results were consistent with those reported by  
302 Li et al. (2017) and Martini et al. (2019). To examine the variations of identified protein, we  
303 calculated the percentages of shared proteins for each protein source between control and EA  
304 conditions in the gastric and intestinal phases relative to the total number of proteins (Suppl. Table  
305 2), and found that except for the soy protein, the proportions of shared proteins in all protein groups  
306 increased from the gastric to the intestinal phase. This result revealed that the differences of meat  
307 protein digestion between EA and control conditions decreased with time, while it increased for  
308 soy protein.

309 To evaluate the characteristics of different protein profiles at both the qualitative and quantitative  
310 levels, principal component analysis was applied based on the protein intensity (Figure 5). There  
311 was a high degree of similarity among meat protein groups. Specifically, the profiles of the gastric  
312 control (G-C) and the gastric EA (G-EA) conditions were clearly separated on both PC1 and PC2;  
313 however, the difference between intestinal control (I-C) and intestinal EA (I-EA) conditions  
314 greatly decreased. For the soy protein, G-C and G-EA, I-C and I-EA were all separated from each  
315 other, respectively. It is worth noting that the distance of soy protein between G-C and I-C  
316 conditions was very small compared to meat protein groups, which implied that soy protein was  
317 to a great extent digested in the gastric phase. These results confirmed of the results obtained using  
318 SDS-PAGE analysis, and further emphasized that the digestion of meat protein and soy protein  
319 was differentially affected by changes in the pH and pepsin concentration in the gastric phase with  
320 soy protein being more susceptible to the changes of digestion pH and enzyme concentration.

### 321 3.5 Differentially abundant proteins

322 To further examine which specific proteins were susceptible to the changes under the different  
323 digestion conditions, we analyzed proteins that exhibited differential abundance comparing control  
324 and EA conditions. We term such protein differentially abundant proteins (DAPs) (Figure 6). We  
325 defined DAPs as proteins that exhibited an average fold change in abundance ( $EA/C \geq 1.5$  or  $\leq$   
326  $0.67$ , and a  $p$  value  $< 0.05$  at each time point between control and EA conditions. In total 50, 38,  
327 24 and 67 DAPs were filtered out in the digests of chicken, beef, pork, and soy protein, respectively.  
328 For the meat proteins, the DAPs in the gastric phase accounted for a large proportion of the DAPs,  
329 a proportion that was greatly reduced in intestinal phase. However, the number of DAPs derived  
330 from soy protein did not decrease significantly going from the gastric to the intestinal phase. This  
331 result indicated that the difference in the digestion of meat protein between control and EA  
332 conditions was significant in gastric phase, but fewer differences were observed in the intestinal  
333 phase. By contrast, the difference between control and EA conditions remained high for soy  
334 protein both in the gastric (34 DAPs) and the intestinal (33 DAPs) phase.

335 For the meat proteins, myofibrillar proteins (myosin, actin, tropomyosin and troponin) and  
336 sarcoplasmic proteins (fructose-bisphosphate aldolase, phosphoglycerate kinase 1 and beta-  
337 enolase) were mainly identified under control and EA conditions. This result is consistent with the  
338 study showing muscle proteins as the main sources of peptides in all in vitro digested meat samples  
339 (Martini et al., 2019). In addition, the major DAPs identified with higher intensity under the control  
340 condition in the gastric phase were myofibrillar proteins, especially for digestion of pork protein,  
341 indicating a higher degree of degradation of these proteins under control conditions than EA  
342 conditions. On the contrary, the abundance of myozenin, PDZ and LIM domain protein, and  
343 sarcoplasmic proteins was higher under the EA condition. Previous studies found that myofibrillar



344 proteins are hydrolyzed more easily than sarcoplasmic proteins during in vitro digestion  
345 (Rodríguez, Núñez, Córdoba, Bermúdez, & Asensio, 1998). The abundance of myofibrillar  
346 proteins was indeed higher than that of sarcoplasmic proteins under the control condition in our  
347 experiments (Suppl. Table 3). However, this situation was not recapitulated under the EA  
348 condition. We speculate that the increased pH might lead to a change in the structure of the protein,  
349 which led to the difference in digestibility.

350 For soy protein, it should be noted that due to the limitation of the UniProt database, many of the  
351 identified proteins were unannotated, while few proteins from meat were unannotated. A high  
352 proportion of unannotated proteins from soy was also reported by Koo et al. (2015), who identified  
353 15 unknown proteins from 33 gel spots in soy. In addition, we observed that the degree of  
354 degradation of glycinin, beta-conglycinin and lipoxygenase under the control condition was higher  
355 than under the EA condition. This result is consistent with the results of the SDS-PAGE analysis.  
356 The intensity of glycinin and beta-conglycinin bands under the control condition was significantly  
357 decreased, while there were no significant changes under the EA condition. In gastric phase, taking  
358 beta-conglycinin beta subunit 1 (CG-4) as an example, the abundance was higher and increased  
359 significantly with the digestion time under the control condition (Suppl. Table 3). The change of  
360 glycinin G1 (GY1) in the intestinal phase during the digestion process was also very pronounced.  
361 GY1 was degraded at the initial time point under the control condition and the degradation  
362 gradually increased over time, while the abundance under the EA condition was comparable to  
363 control until 240 min of digestion.

364 In conclusion, this study systematically evaluated the effect of digestion conditions of meat  
365 proteins and soy protein in the gastric and intestinal phase employing conditions that mimicked  
366 the conditions found in healthy adults (controls) and elderly with increase stomach pH as found in

367 individuals suffering from achlorhydria (EA conditions). Our results demonstrated that the EA GI  
368 condition markedly influenced meat and soy proteins digestion, including DH, peptide generation,  
369 and protein characteristics (SDS-PAGE, intensity and DAPs). For meat proteins, the digestion  
370 profiles were affected by the altered gastric conditions, but the differences between EA and control  
371 conditions gradually diminished in the intestinal phase. The digestion profile of soy protein was  
372 more susceptible to the altered GI digestive conditions compared to the meat proteins. These  
373 results serve as first step contributing to the establishment of dietary recommendation especially  
374 for the elderly individuals based on the possible effects of the prevalent changes in the GI tract  
375 observed in a relatively large fraction of elderly individuals.

## 376 **References**

- 377 Aalaei, K., Khakimov, B., De Gobba, C., & Ahrné, L. (2021). Digestion patterns of proteins in pasteurized  
378 and ultra-high temperature milk using in vitro gastric models of adult and elderly. *Journal of Food*  
379 *Engineering*, 292, 110305.
- 380 Carbonaro, M., Maselli, P., & Nucara, A. (2012). Relationship between digestibility and secondary  
381 structure of raw and thermally treated legume proteins: a Fourier transform infrared (FT-IR)  
382 spectroscopic study. *Amino acids*, 43(2), 911-921.
- 383 Cheng, M., & Duan, C. (2021). The changing trends of internal migration and urbanization in China: new  
384 evidence from the seventh National Population Census. *China Population and Development*  
385 *Studies*, 1-21.
- 386 Dangin, M., Boirie, Y., Garcia-Rodenas, C., Gachon, P., Fauquant, J., Callier, P., Ballèvre, O., Beaufrère,  
387 B. (2001). The digestion rate of protein is an independent regulating factor of postprandial protein  
388 retention. *American Journal of Physiology-Endocrinology And Metabolism*.
- 389 Heda, R., Toro, F., & Tombazzi, C. R. (2019). Physiology, pepsin.
- 390 Hernández-Olivas, E., Muñoz-Pina, S., Andrés, A., & Heredia, A. (2020). Impact of elderly gastrointestinal  
391 alterations on in vitro digestion of salmon, sardine, sea bass and hake: Proteolysis, lipolysis and  
392 bioaccessibility of calcium and vitamins. *Food chemistry*, 326, 127024.
- 393 Hernández-Olivas, E., Muñoz-Pina, S., Andrés, A., & Heredia, A. (2021). Impact of cooking preparation  
394 on in vitro digestion of eggs simulating some gastrointestinal alterations in elders. *Journal of*  
395 *Agricultural and Food Chemistry*, 69(15), 4402-4411.
- 396 Hur, S. J., Lim, B. O., Decker, E. A., & McClements, D. J. (2011). In vitro human digestion models for  
397 food applications. *Food chemistry*, 125(1), 1-12.
- 398 Husebye, E., Skar, V., Høverstad, T., & Melby, K. (1992). Fasting hypochlorhydria with gram positive  
399 gastric flora is highly prevalent in healthy old people. *Gut*, 33(10), 1331-1337.
- 400 Koo, S. C., Kim, S. G., Bae, D.-W., Kim, H. Y., Kim, H. T., Lee, Y. H., Kang, B. K., Beak, S.-B., Yun, H.  
401 T., Choi, M. S. (2015). Biochemical and proteomic analysis of soybean sprouts at different  
402 germination temperatures. *Journal of the Korean Society for Applied Biological Chemistry*, 58(3),  
403 397-407.
- 404 Larsen, L. B., Rasmussen, M. D., Bjerring, M., & Nielsen, J. H. (2004). Proteases and protein degradation  
405 in milk from cows infected with *Streptococcus uberis*. *International Dairy Journal*, 14(10), 899-  
406 907.

- 407 Li, L., Liu, Y., Zou, X., He, J., Xu, X., Zhou, G., & Li, C. (2017). In vitro protein digestibility of pork  
408 products is affected by the method of processing. *Food Research International*, 92, 88-94.
- 409 Martini, S., Conte, A., & Tagliazucchi, D. (2019). Comparative peptidomic profile and bioactivities of  
410 cooked beef, pork, chicken and turkey meat after in vitro gastro-intestinal digestion. *Journal of*  
411 *proteomics*, 208, 103500.
- 412 Minekus, M., Alminger, M., Alvito, P., Ballance, S., Bohn, T., Bourlieu, C., Dupont, D. (2014). A  
413 standardised static in vitro digestion method suitable for food-an international consensus. *Food &*  
414 *function*, 5(6), 1113-1124.
- 415 Nations, U. (2019). World population prospects 2019: highlights. *Department of Economic and Social*  
416 *Affairs, Population Division*.
- 417 Nguyen, T. T., Bhandari, B., Cichero, J., & Prakash, S. (2015). Gastrointestinal digestion of dairy and soy  
418 proteins in infant formulas: An in vitro study. *Food Research International*, 76, 348-358.
- 419 Rick, W. (1974). Trypsin. In *Methods of enzymatic analysis* (pp. 1013-1024): Elsevier.
- 420 Roberts, N. (2006). human pepsins-their multiplicity, function and role in reflux disease. *Alimentary*  
421 *pharmacology & therapeutics*, 24, 2-9.
- 422 Rodríguez, M., Núñez, F., Córdoba, J., Bermúdez, M., & Asensio, M. (1998). Evaluation of proteolytic  
423 activity of micro-organisms isolated from dry cured ham. *Journal of Applied Microbiology*, 85(5),  
424 905-912.
- 425 Russell, T. L., Berardi, R. R., Barnett, J. L., Dermentzoglou, L. C., Jarvenpaa, K. M., Schmaltz, S. P., &  
426 Dressman, J. B. (1993). Upper gastrointestinal pH in seventy-nine healthy, elderly, North American  
427 men and women. *Pharmaceutical research*, 10(2), 187-196.
- 428 Shani-Levi, C., Alvito, P., Andrés, A., Assunção, R., Barberá, R., Blanquet-Diot, S., Deglaire, A., Lesmes,  
429 U. (2017). Extending in vitro digestion models to specific human populations: Perspectives,  
430 practical tools and bio-relevant information. *Trends in Food Science & Technology*, 60, 52-63.
- 431 Sharp, G. S., & Fister, H. W. (1967). The diagnosis and treatment of achlorhydria: ten-year study. *Journal*  
432 *of the American Geriatrics Society*, 15(8), 786-791.
- 433 Tian, T., Teng, F., Zhang, S., Qi, B., Wu, C., Zhou, Y., Li, L., Wang, Z., Li, Y. (2019). A study of structural  
434 change during in vitro digestion of heated soy protein isolates. *Foods*, 8(12), 594.
- 435 Villanacci, V., Casella, G., Lanzarotto, F., Di Bella, C., Sidoni, A., Cadei, M., Salviato, T., Dore, M.,  
436 Bassotti, G. (2017). Autoimmune gastritis: relationships with anemia and *Helicobacter pylori* status.  
437 *Scandinavian journal of gastroenterology*, 52(6-7), 674-677.

- 438 Wan, Y., & Guo, S. (2019). The formation and disaggregation of soy protein isolate fibril: Effects of pH.  
439 *Food Biophysics*, 14(2), 164-172.
- 440 Wardlaw, G. M., & Insel, P. M. (1996). *Perspectives in nutrition*: Mosby.
- 441 Wen, S., Zhou, G., Song, S., Xu, X., Voglmeir, J., Liu, L., Zhao, F., Li, M., Yu, X., Bai, Y., Li, C. (2015).  
442 Discrimination of in vitro and in vivo digestion products of meat proteins from pork, beef, chicken,  
443 and fish. *Proteomics*, 15(21), 3688-3698.
- 444 Xiao, J., Shi, C., Zhang, L., Li, Y., Qi, J., Wang, Y., & Huang, Q. (2016). Multilevel structural responses  
445 of  $\beta$ -conglycinin and glycinin under acidic or alkaline heat treatment. *Food Research International*,  
446 89, 540-548.
- 447 Yang, Y., Wang, Z., Wang, R., Sui, X., Qi, B., Han, F., Li, Y., Jiang, L. (2016). Secondary structure and  
448 subunit composition of soy protein in vitro digested by pepsin and its relation with digestibility.  
449 *BioMed research international*, 2016.
- 450 Zhao, D., Xu, Y., Gu, T., Wang, H., Yin, Y., Sheng, B., Li, Y., Nian, Y., Wang, C., Li, C., Xu, X., Zhou,  
451 G. (2019). Peptidomic investigation of the interplay between enzymatic tenderization and the  
452 digestibility of beef semimembranosus proteins. *Journal of Agricultural and Food Chemistry*,  
453 68(4), 1136-1146.
- 454

455 **AUTHOR INFORMATION**

456 **Corresponding Author**

457 Telephone: +86 25 8439 5730. E-mail: [guanghong.zhou@hotmail.com](mailto:guanghong.zhou@hotmail.com);

458 Telephone: +45 3532 4443. E-mail: [kk@bio.ku.dk](mailto:kk@bio.ku.dk)

459 **ACKNOWLEDGEMENTS**

460 This research was supported by the National Natural Science Foundation of China (32001721) and

461 Priority Academic Program Development of Jiangsu Higher Education Institutions (RAPD).

462 **Notes**

463 The authors declare no competing financial interest.

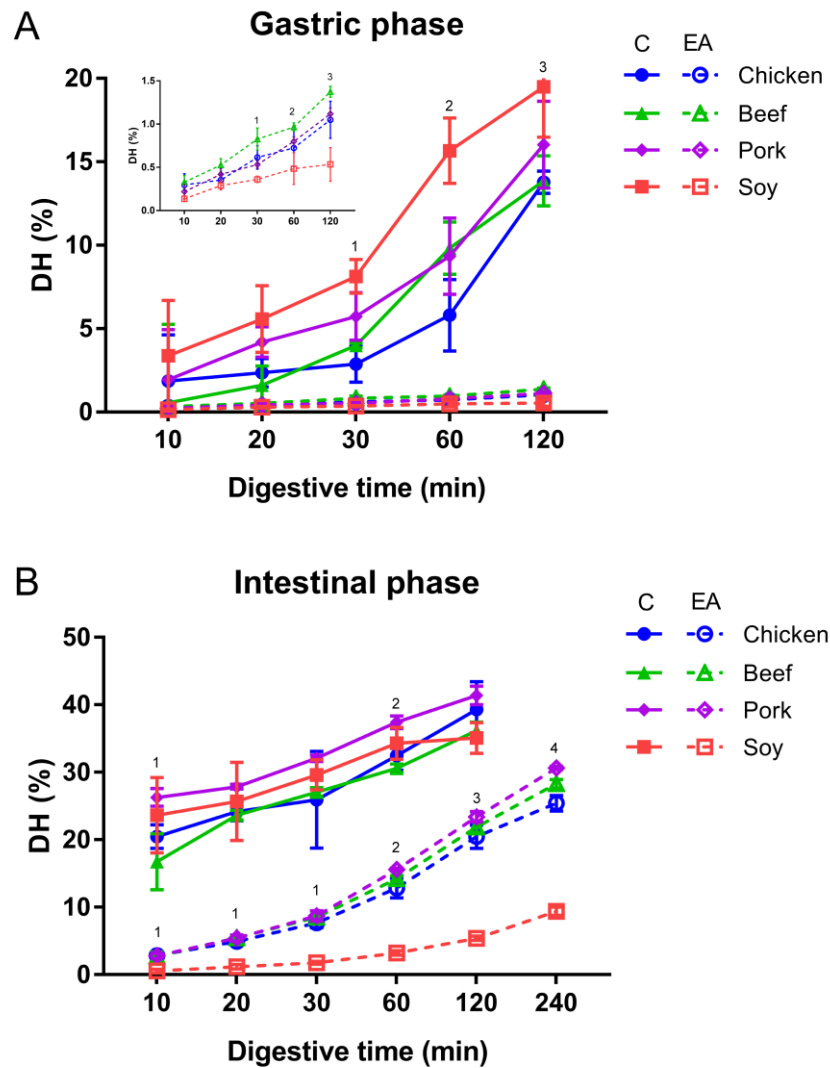

464

465 **Figure 1. Degree of hydrolysis of different proteins in the gastric phase (A) and the intestinal**  
466 **phase (B).** Meat and soy proteins were subjected to in vitro digestion using conditions that  
467 mimicked the gastro-intestinal conditions in young healthy individuals (control, C) and elderly  
468 individuals with decreased secretion of HCl in the stomach, achlorhydria (EA). The degree of  
469 hydrolysis (DH) was followed using a fluorecamine-based assay. Error bars represent the standard  
470 deviation obtained from three replicated experiments. Statistical analysis ( $p < 0.05$ ): Control gastric  
471 phase (1: chicken vs soy; 2: chicken, beef, pork vs soy; 3: chicken, beef vs soy). EA gastric phase

472 (1: chicken, beef vs soy; beef vs pork; 2: beef, pork vs soy; 3: chicken, beef, pork vs soy; beef vs  
473 pork; chicken vs beef). Control intestinal phase (1: beef vs pork; beef vs soy; 2: beef vs pork). EA  
474 intestinal phase (1: chicken, beef, pork vs soy; 2: chicken, beef, pork vs soy; chicken vs pork; 3:  
475 chicken, beef, pork vs soy; chicken, beef vs pork; 4: chicken, beef, pork vs soy; chicken, beef vs  
476 pork; chicken vs beef).

477

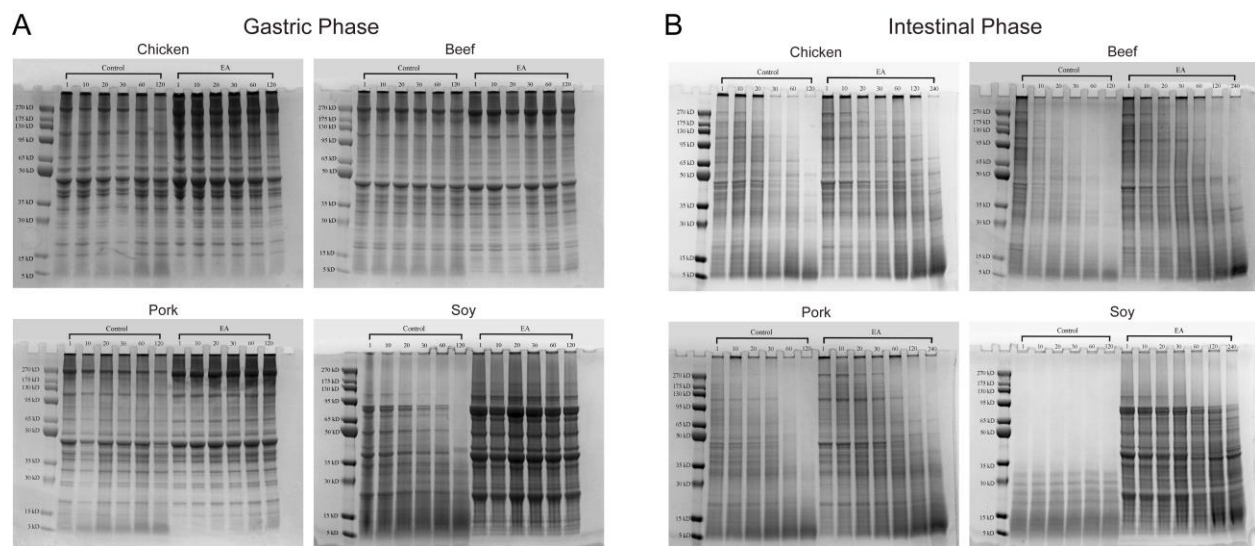

478

479 **Figure 2. SDS-PAGE profiles of different proteins in gastric phase (A) and intestinal phase**  
480 **(B).** Meat and soy proteins were subjected to in vitro digestion using conditions that mimicked the  
481 gastro-intestinal conditions in young healthy individuals (control, C) and elderly individuals with  
482 decreased secretion of HCl in the stomach, achlorhydria (EA). Lanes 1, 10, 20, 30, 60, 120 and  
483 240 refer to sample digestion time (min).



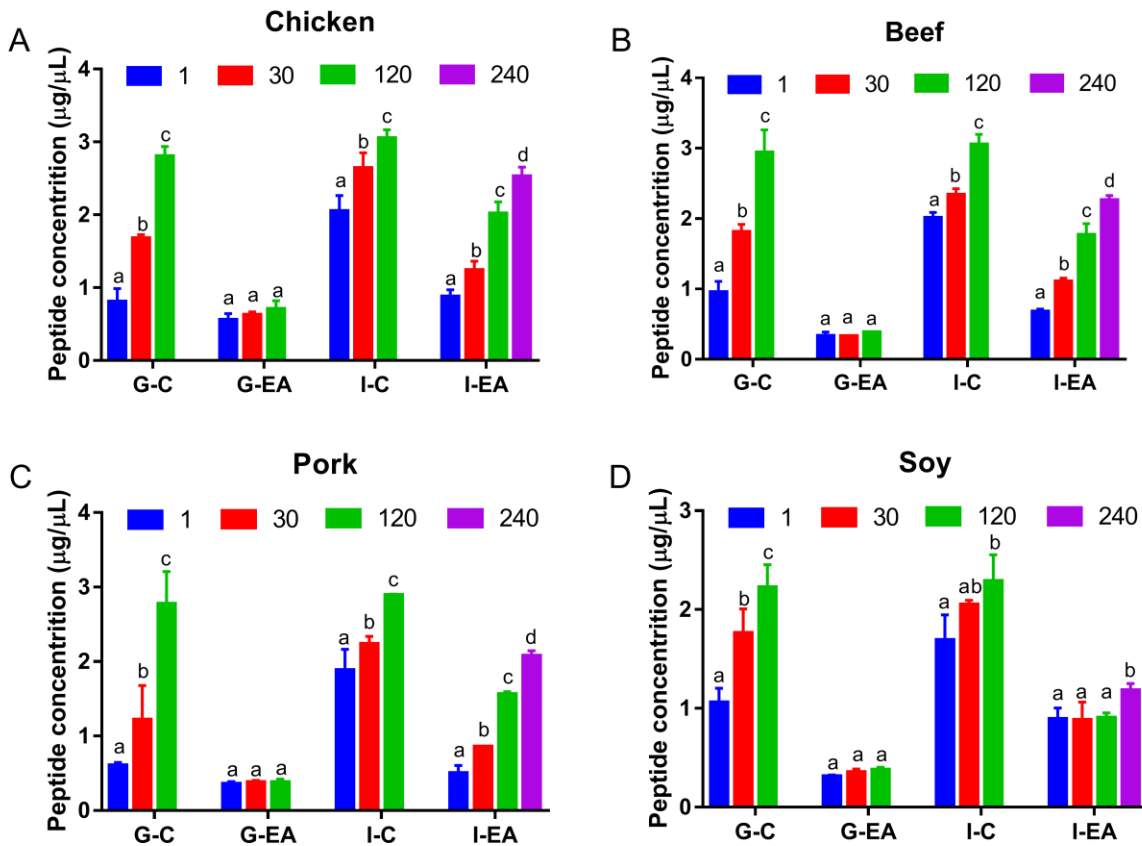

484

485 **Figure 3. Peptide concentration of different proteins after digestion for 1, 30, 120 and 240**

486 **min.** Meat and soy proteins were subjected to in vitro digestion using conditions that mimicked

487 the gastric and intestinal conditions in young healthy individuals (G-C, I-C) and elderly individuals

488 with decreased secretion of HCl in the stomach, achlorhydria (G-EA, I-EA), respectively. The

489 peptide concentration was detected with Nanodrop at 280 nm. Bars with different letters are

490 significantly different at the level  $p < 0.05$ . 1, 30, 120 and 240 refer to sample digestion time (min).

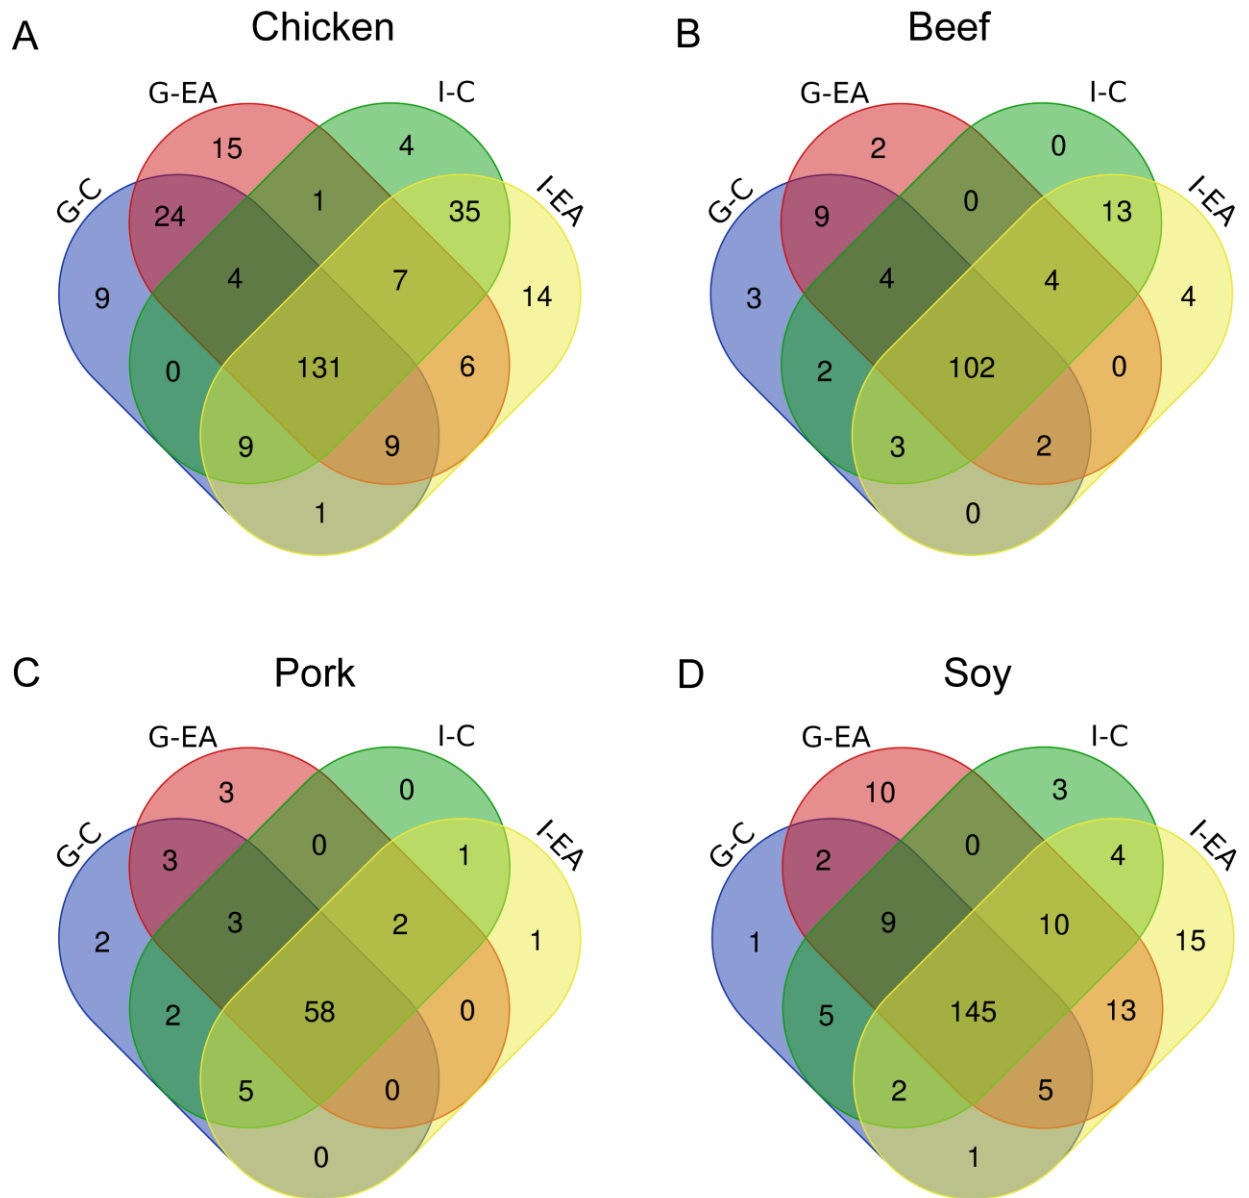

491

492 **Figure 4. Venn diagrams of identified proteins after gastric and intestinal digestion under**

493 **control and elderly with achlorhydria conditions. Meat and soy proteins were subjected to in**

494 **vitro digestion using conditions that mimicked the gastric and intestinal conditions in young**

495 **healthy individuals (G-C, I-C) and elderly individuals with decreased secretion of HCl in the**

496 **stomach, achlorhydria (G-EA, I-EA), respectively. The value on the Venn diagrams refers to the**

497 **number of identified proteins.**

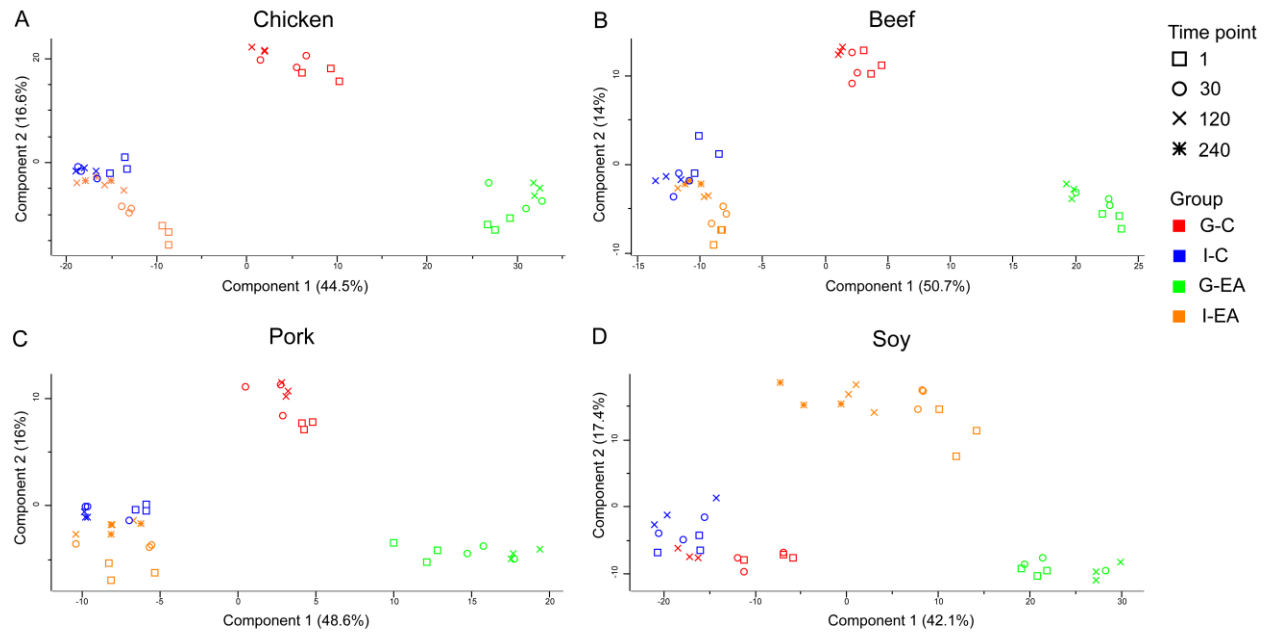

498

499 **Figure 5. Principal component analysis for the identified proteins after gastric and intestinal**  
500 **digestion under control and elderly with achlorhydria conditions.** Meat and soy proteins were  
501 subjected to in vitro digestion using conditions that mimicked the gastric and intestinal conditions  
502 in young healthy individuals (G-C, I-C) and elderly individuals with decreased secretion of HCl  
503 in the stomach, achlorhydria (G-EA, I-EA), respectively. 1, 30, 120 and 240 refer to sample  
504 digestion time (min).

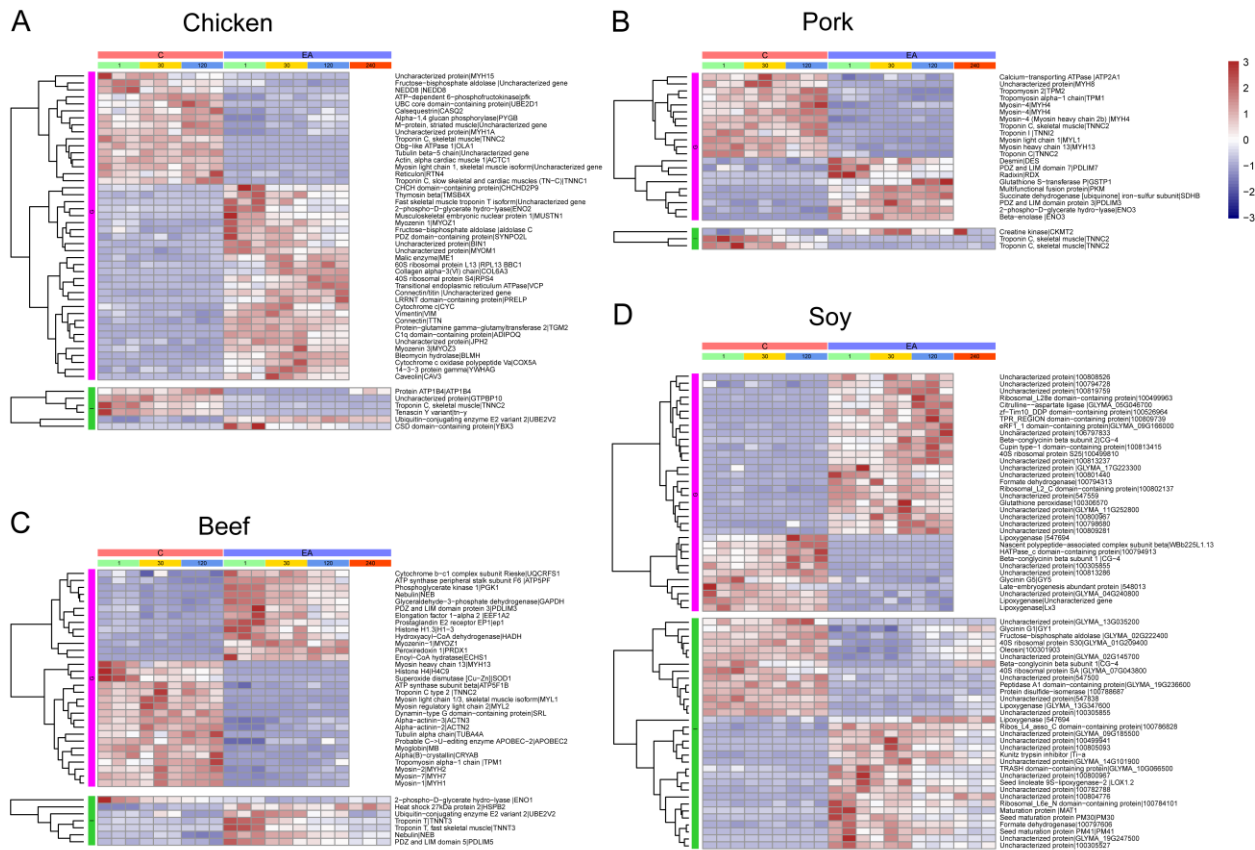

505

506 **Figure 6. Hierarchical clustering of identified differential abundant proteins. Meat and soy**

507 proteins were subjected to in vitro digestion using conditions that mimicked the gastro (G)-

508 intestinal (I) conditions in young healthy individuals (control, C) and elderly individuals with

509 decreased secretion of HCl in the stomach, achlorhydria (EA). The left side of the protein

510 description is the name of protein, the right side of the protein description is the name of the

511 corresponding gene. 1, 30, 120 and 240 refer to sample digestion time (min).

512

513
